# Supplementary material for: Identification of novel QTLs for grain fertility and associated traits to decipher poor grain filling of basal spikelets in dense panicle rice
Source: PubMed Central journal article supplement (PMC8245594; doi:10.1038/s41598-021-93134-7), 2021-06-30

**Supplementary Fig. 1** Frequency distribution of RILs for the traits, spikelet fertility percentage (SFP), inter-grain space(cm)(IGS) and ethylene (ETH) production (pmole/gfw/ml (air)/hr), derived from PDK Shriram (HGN) and Heera. X-axis shows values of traits and Y-axis shows frequency RILs for the traits, SFP, IGS and ETH in *kharif* 2017 (3a), and *in kharif* 2018 (3b).

**Supplementary Fig. 2** Relative expression level in fold of ethylene-responsive genes and *GBSSI* (a) Ethylene responsive transcription factor 8 also named as ethylene responsive factor 3 (*ERF3*), (b) AP2-like ethylene-responsive transcription factor (*AP2-ERF*), (c) Ethylene-responsive element binding protein (EREBP) transcription factor, and (d) Granule bound starch synthase 1 (*GBSSI*) on 6<sup>th</sup> day, 9<sup>th</sup> day and 12<sup>th</sup> day after anthesis in the basal over apical spikelets of compact paniced PDK Shriram (HGN), RIL-166A and lax-paniced Heera, RIL-14A, determined by qRT-PCR. Rice actin was taken as internal reference. Data represent mean ( $\pm$ SD) using three biological replicates.

**Supplementary Fig. 3** Relative expression level in fold of (a) E3 ubiquitin-protein ligase *GW2*, (b) serine carboxypeptidaseII-2, and (c) LRR receptor-like serine/ threonine-protein kinase *ERL1* on 6<sup>th</sup> day, 9<sup>th</sup> day and 12<sup>th</sup> day after anthesis in the basal over apical spikelets of compact paniced PDK Shriram (HGN), RIL-166A and lax-paniced Heera, RIL-14A, determined by qRT-PCR. Rice actin was taken as internal reference. Data represent mean ( $\pm$ SD) of three biological replicates.

Supplementary Fig. 1.

a

Kharif season 2017

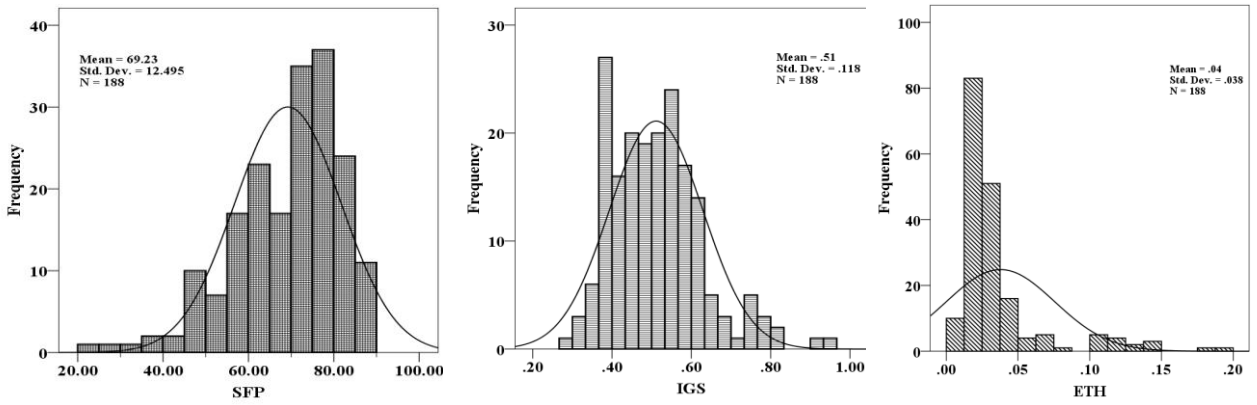

b

Kharif Season 2018

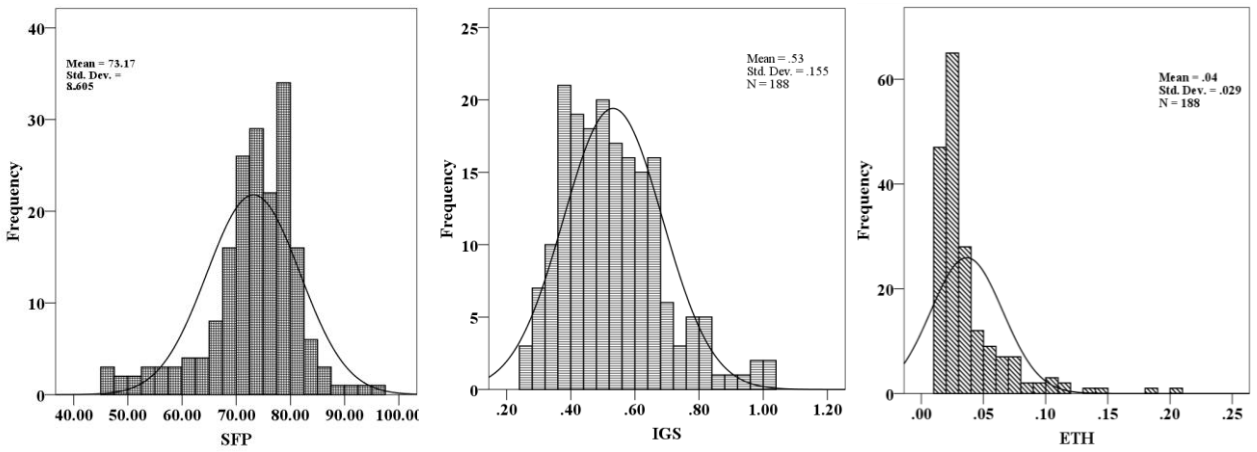

**Supplementary Fig. 2.**

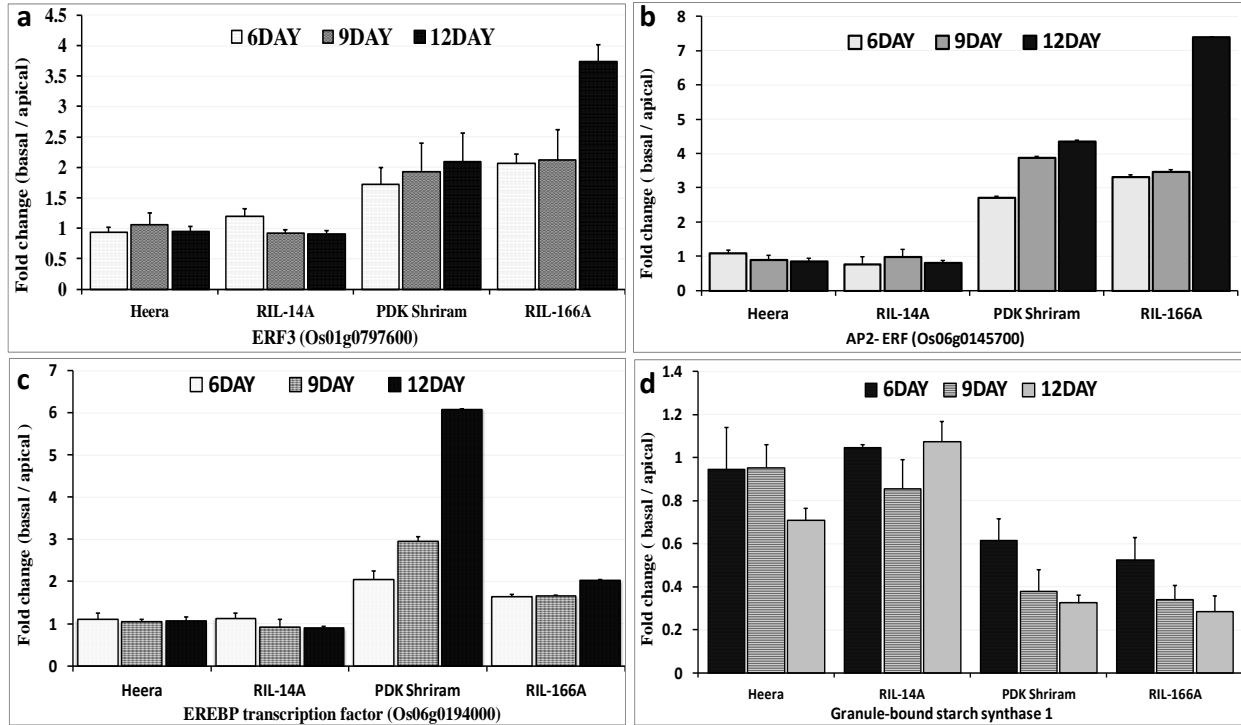

Supplementary Fig. 3.

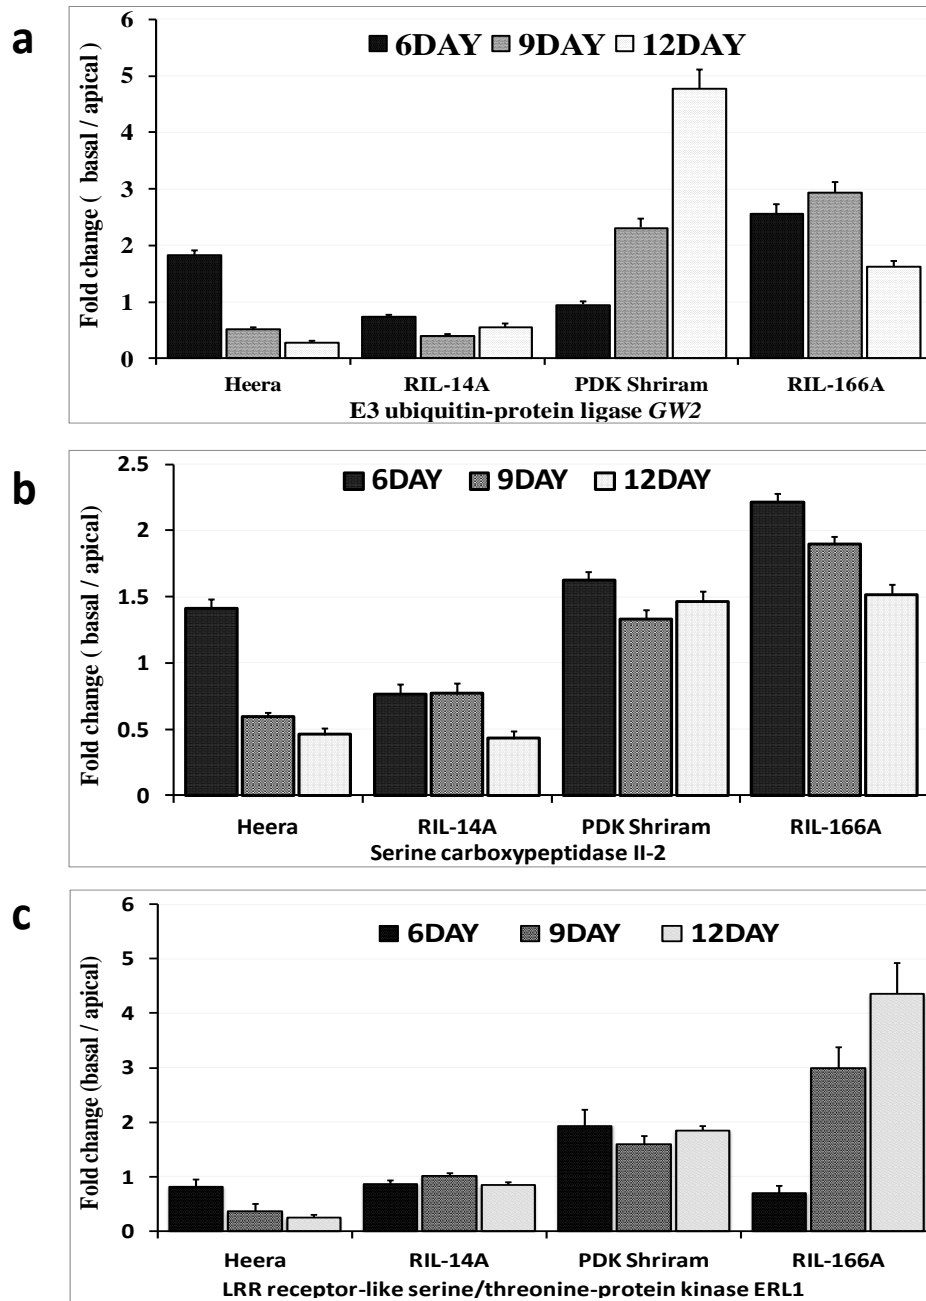

Supplement: 41598_2021_93134_MOESM1_ESM.pdf [file 41598_2021_93134_MOESM1_ESM.pdf]
